# Supplementary material for: Ultrasound-assisted gatifloxacin delivery in mouse cornea, in vivo
Source: PubMed Central journal article supplement (PMC6820539; doi:10.1038/s41598-019-52069-w), 2019-10-29
Supplement: 41598_2019_52069_MOESM5_ESM.pdf [file 41598_2019_52069_MOESM5_ESM.pdf]

# **Supplementary Information**

## **Ultrasound-assisted gatifloxacin delivery in mouse cornea, *in vivo***

Uk Jegal<sup>1</sup>, Jun Ho Lee<sup>1</sup>, Jungbin Lee<sup>1</sup>, Hyerin Jeong<sup>3</sup>, Myoung Joon Kim<sup>3</sup>, & Ki Hean Kim<sup>1,2,\*</sup>

### **Affiliations:**

<sup>1</sup>Department of Mechanical Engineering, Pohang University of Science and Technology, 77 Cheongam-ro, Nam-gu, Pohang, yeoungbuk 37673, Rep. of Korea

<sup>2</sup>Division of Integrative Biosciences and Biotechnology, Pohang University of Science and Technology, 77 Cheongam-ro, Nam-gu, Pohang, yeoungbuk 37673, Rep. of Korea

<sup>3</sup>Department of Ophthalmology, Ulsan College of Medicine, Asan Medical Center, 88 Olympic-ro 43-gil, Songpa-gu, Seoul 05505, Rep. of Korea

\*Corresponding author: Ki Hean Kim (kiheankim@postech.ac.kr)

## Contents

### List of Supplementary Videos

|                              |                                                                                                                                           |
|------------------------------|-------------------------------------------------------------------------------------------------------------------------------------------|
| <b>Supplementary Video 1</b> | En-face TPM video of a gatifloxacin instilled <i>ex vivo</i> mouse cornea after 10-minute gatifloxacin incubation                         |
| <b>Supplementary Video 2</b> | En-face TPM video of an ultrasound treated and gatifloxacin instilled <i>ex vivo</i> mouse cornea after 10-minute gatifloxacin incubation |
| <b>Supplementary Video 3</b> | En-face TPM video of a gatifloxacin instilled <i>in vivo</i> mouse cornea after 10-minute gatifloxacin incubation                         |
| <b>Supplementary Video 4</b> | En-face TPM video of an ultrasound treated and gatifloxacin instilled <i>in vivo</i> mouse cornea after 10-minute gatifloxacin incubation |

## Supplementary Video & Legends

**Supplementary Video 1:** En-face TPM video of a gatifloxacin instilled *ex vivo* mouse cornea after 10-minute gatifloxacin incubation. (Corresponding to **Fig. 2(a-c)**)

The image size consists of  $512 \times 512$  pixels covering a field-of-view (FOV) of  $310 \mu\text{m} \times 310 \mu\text{m}$  with a stepwise increment of  $2 \mu\text{m}$  along the z-axis. Imaging speed was 0.77 frames/s. Color coding for emission fluorescence was as follows: 455 ~ 680 nm (*green*).

**Supplementary Video 2:** En-face TPM video of an ultrasound treated and gatifloxacin instilled *ex vivo* mouse cornea after 10-minute gatifloxacin incubation. (Corresponding to **Fig. 2(d-f)**)

The image size consists of  $512 \times 512$  pixels covering a field-of-view (FOV) of  $310 \mu\text{m} \times 310 \mu\text{m}$  with a stepwise increment of  $2 \mu\text{m}$  along the z-axis. Imaging speed was 0.77 frames/s. Color coding for emission fluorescence was as follows: 455 ~ 680 nm (*green*).

**Supplementary Video 3:** En-face TPM video of a gatifloxacin instilled *in vivo* mouse cornea after 10-minute gatifloxacin incubation. (Corresponding to **Fig. 3(a-c)**)

The image size consists of  $512 \times 512$  pixels covering a field-of-view (FOV) of  $310 \mu\text{m} \times 310 \mu\text{m}$  with a stepwise increment of  $2 \mu\text{m}$  along the z-axis. Imaging speed was 0.77 frames/s. Color coding for emission fluorescence was as follows: 455 ~ 680 nm (*green*).

**Supplementary Video 4:** En-face TPM video of an ultrasound treated and gatifloxacin instilled *in vivo* mouse cornea after 10-minute gatifloxacin incubation. (Corresponding to **Fig. 3(d-f)**)

The image size consists of  $512 \times 512$  pixels covering a field-of-view (FOV) of  $310 \mu\text{m} \times 310 \mu\text{m}$  with a stepwise increment of  $2 \mu\text{m}$  along the z-axis. Imaging speed was 0.77 frames/s. Color coding for emission fluorescence was as follows: 455 ~ 680 nm (*green*).
